# Supplementary material
Source: PubMed Central journal article supplement (PMC6056872)

# Figure S1

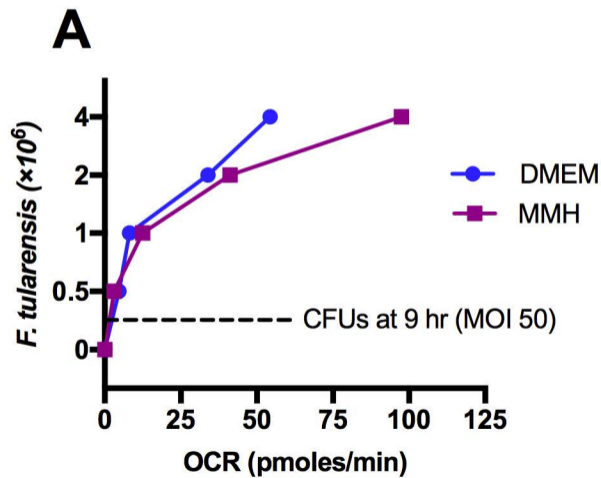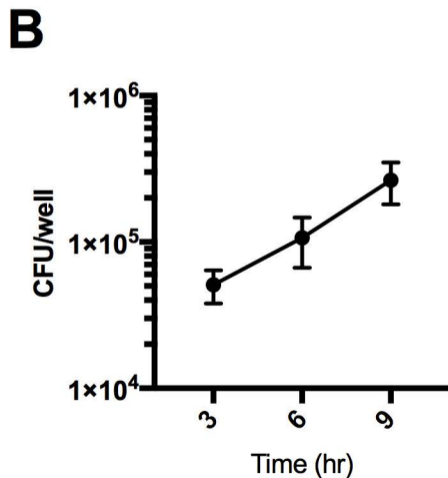

# Figure S2

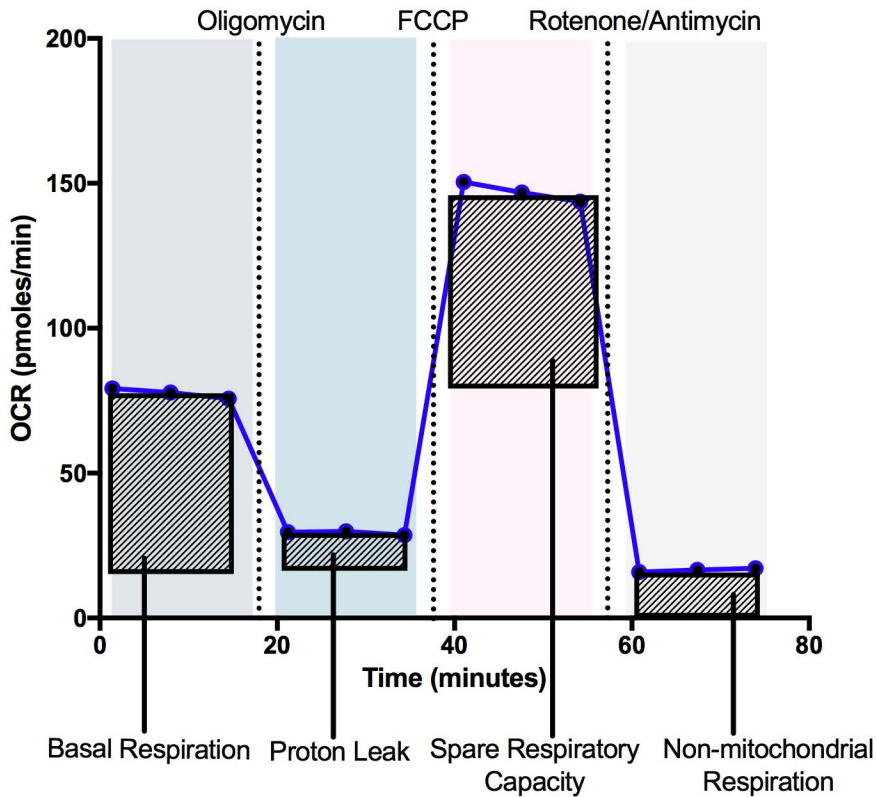

# Figure S3

## Basal Respiration

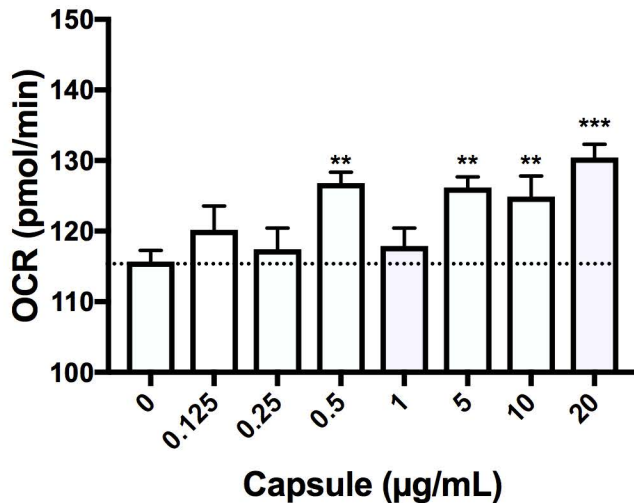

## Spare Respiratory Capacity

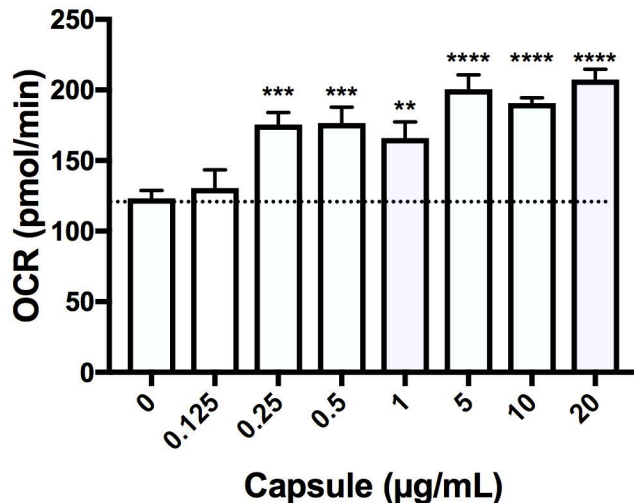

# Figure S4

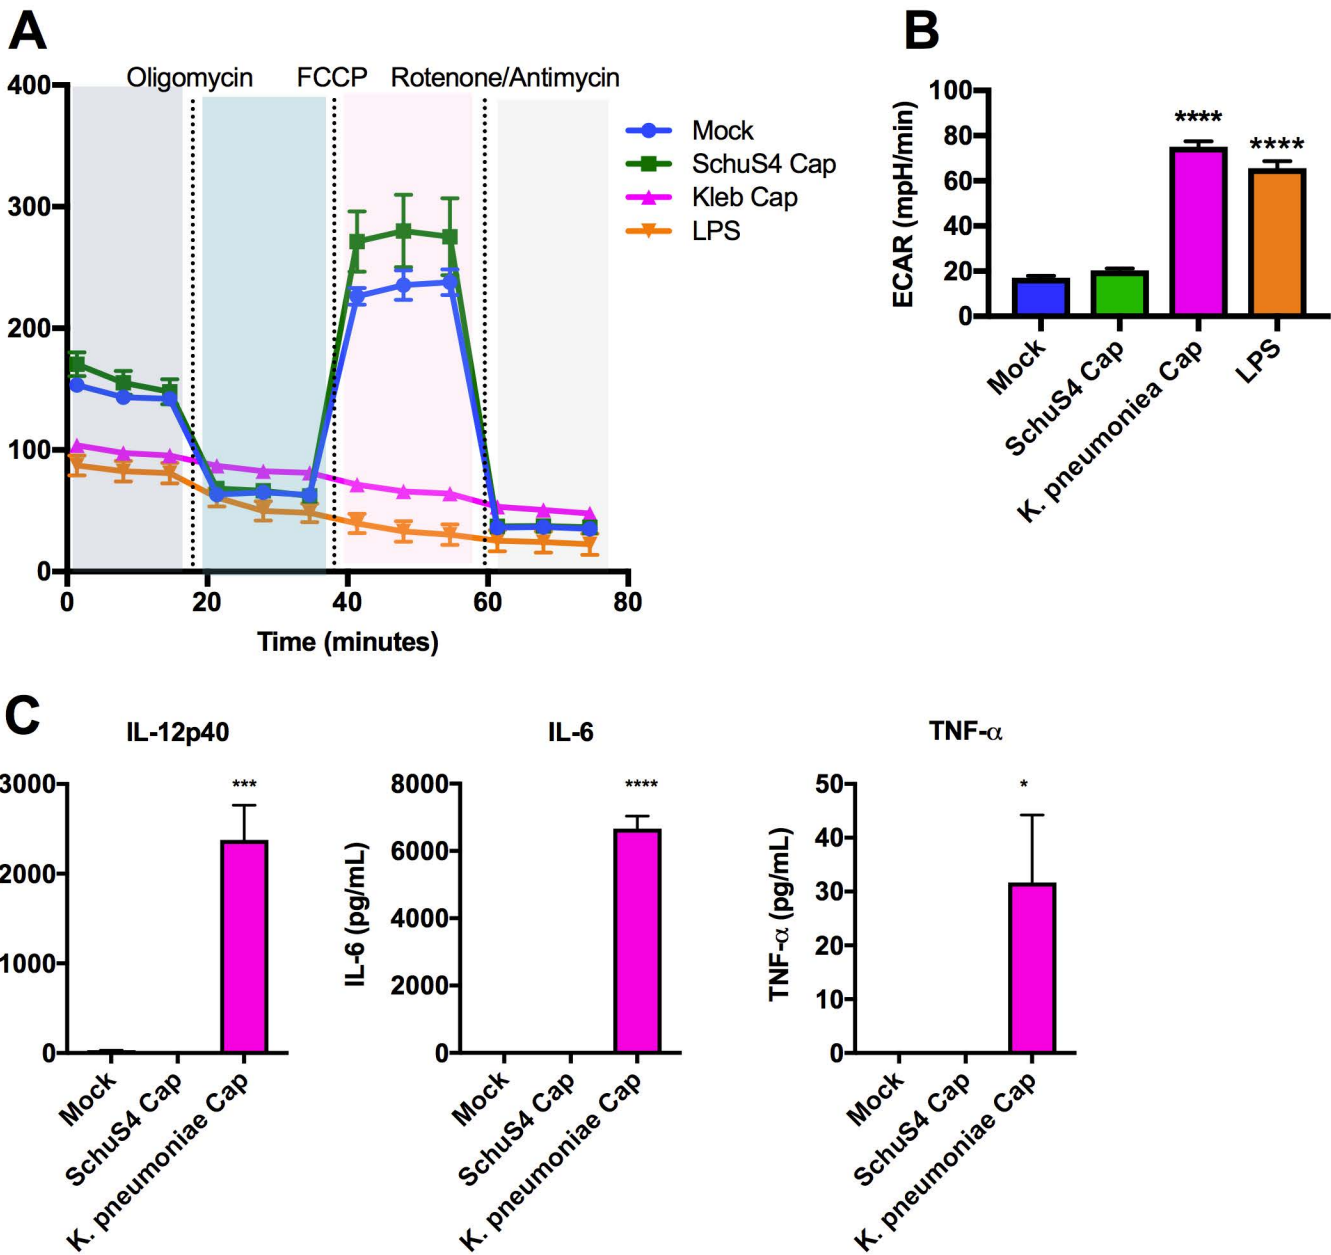

**Figure S5**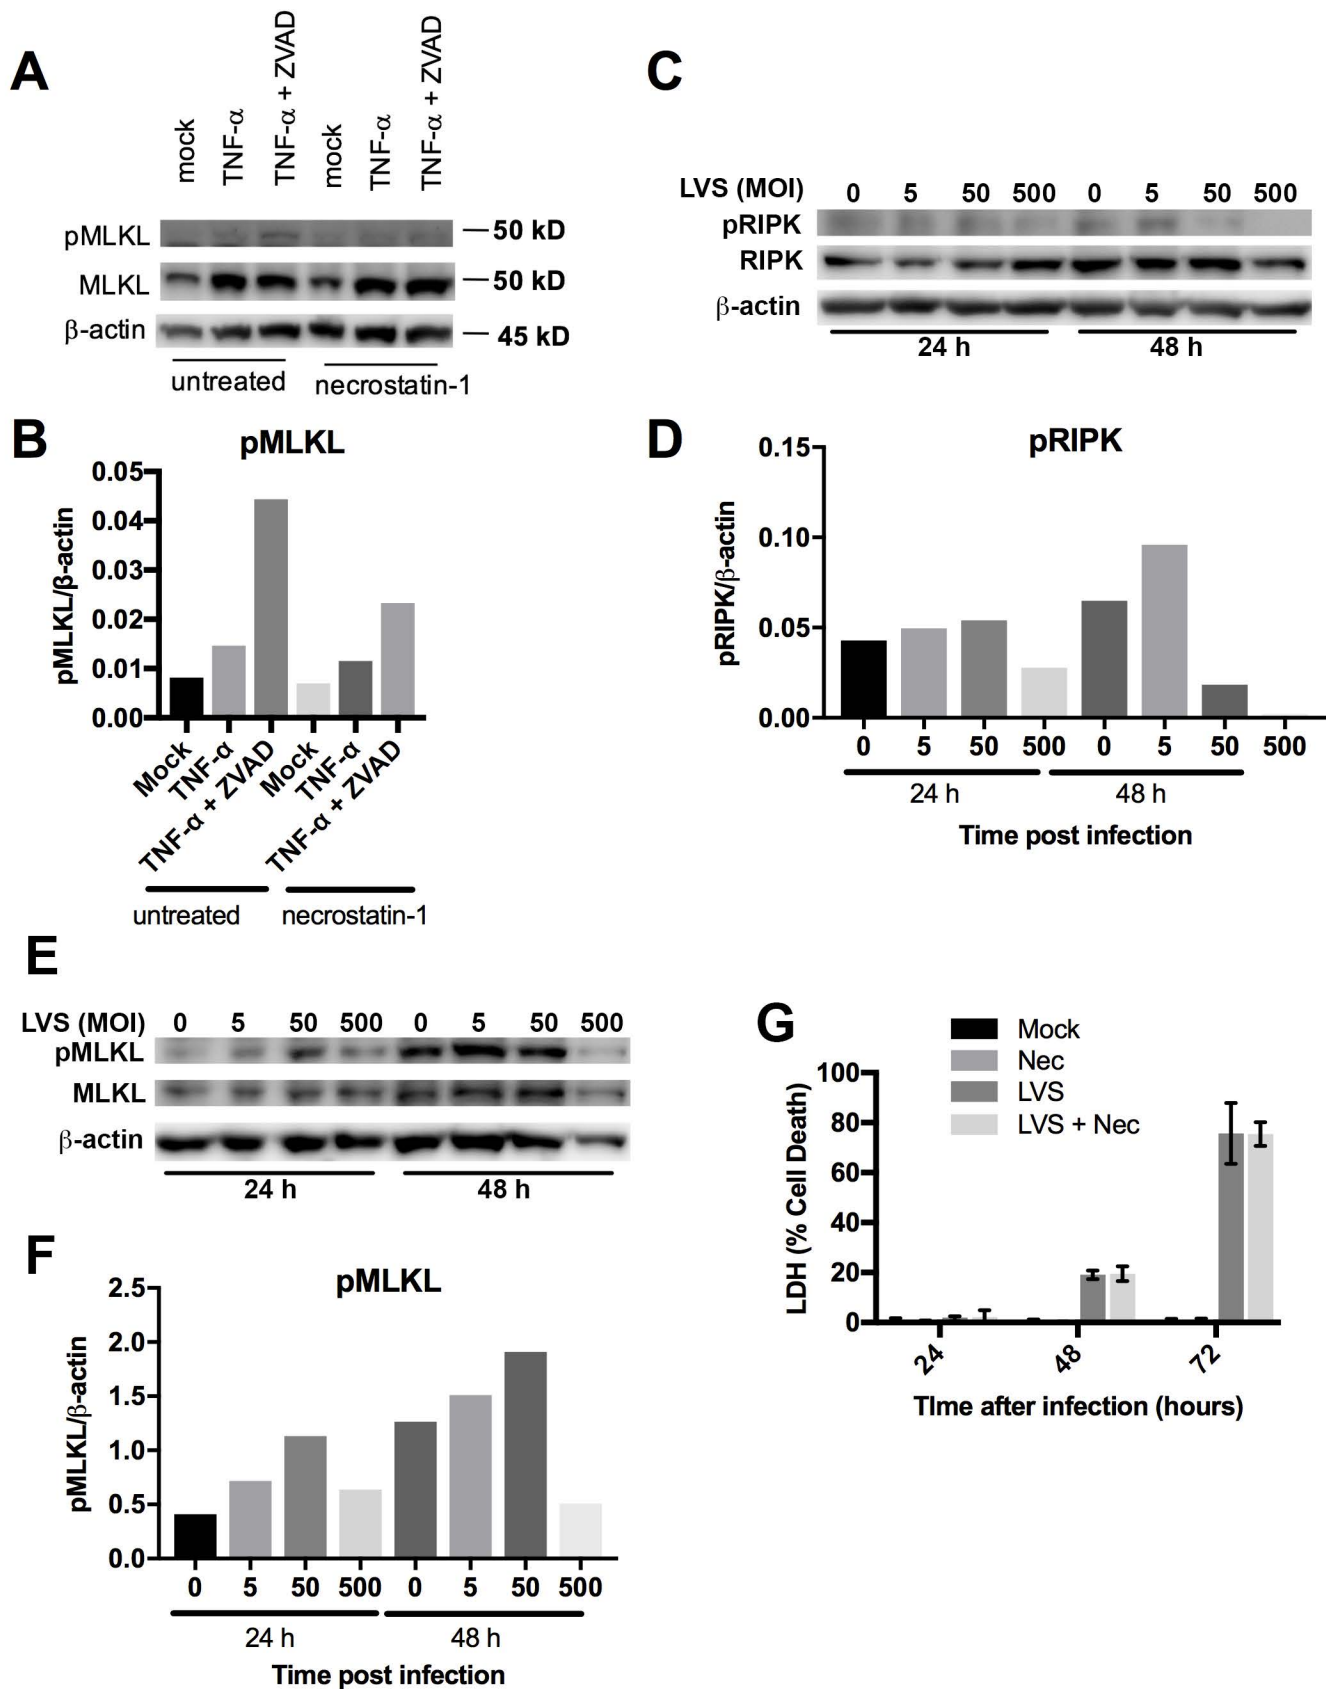

# Figure S6

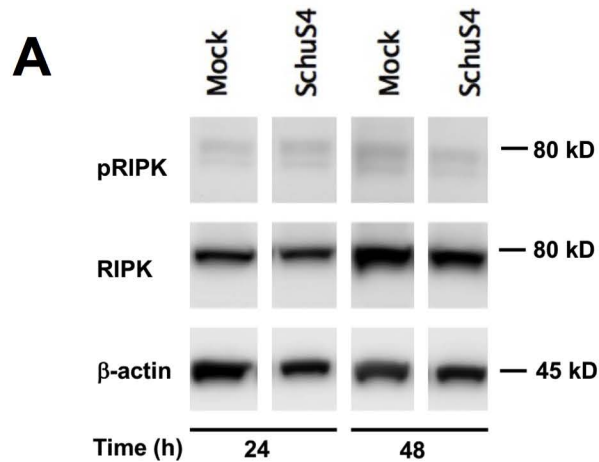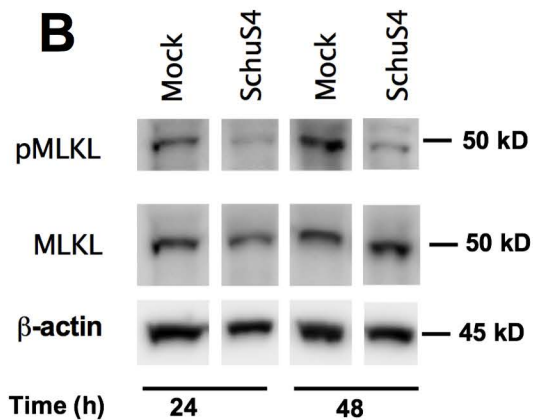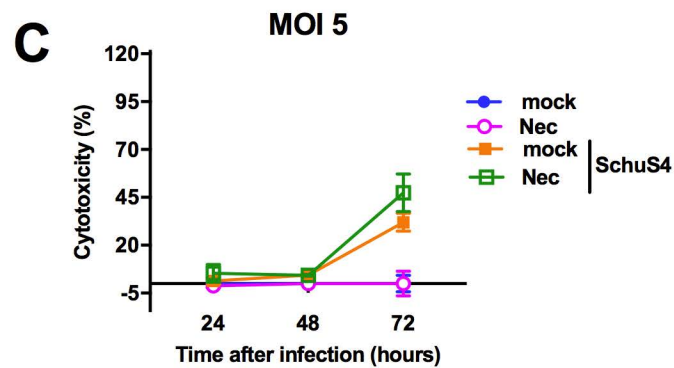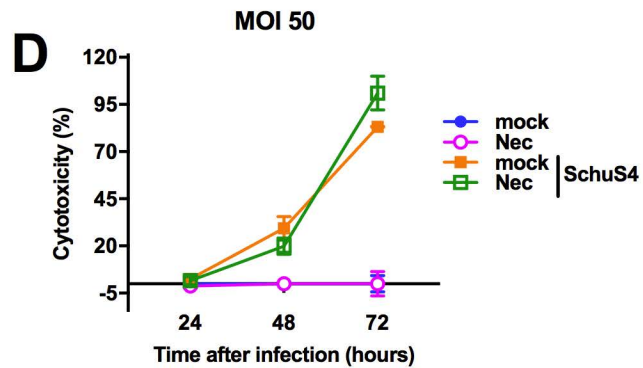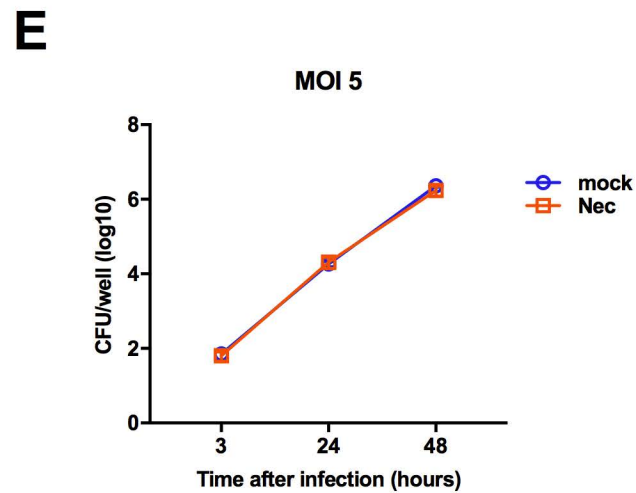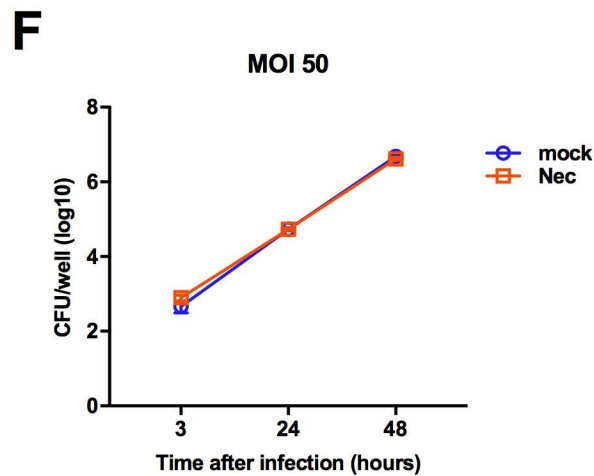

# Figure S7

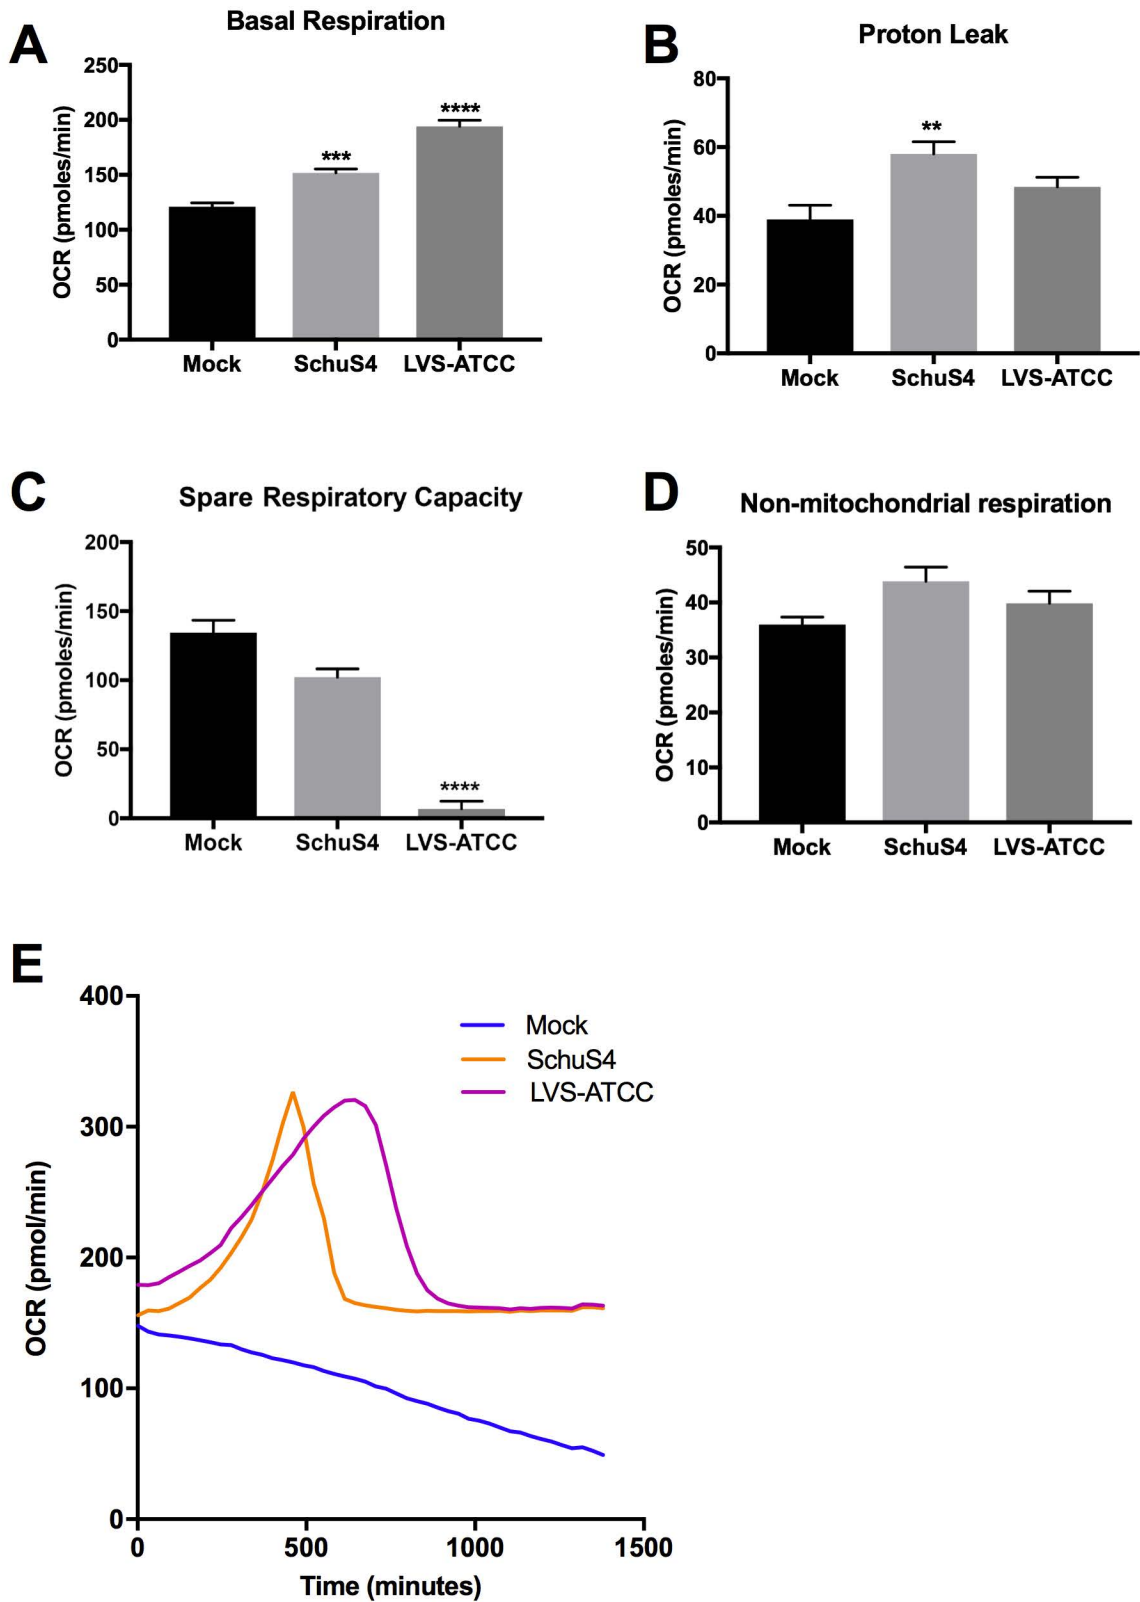

# Figure S8

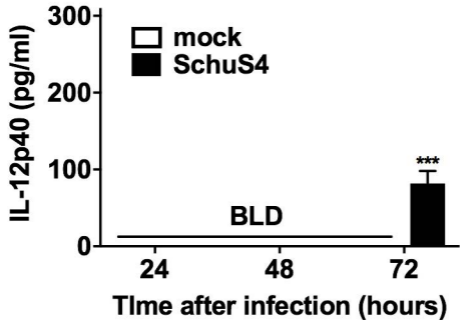



# Figure S9

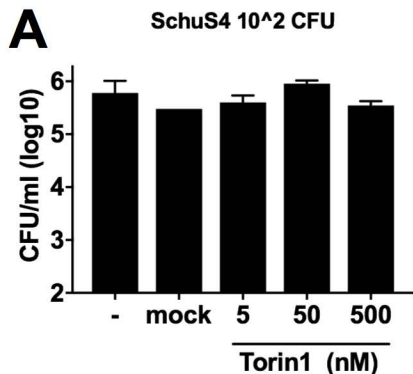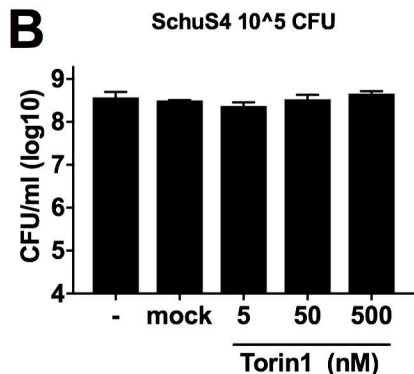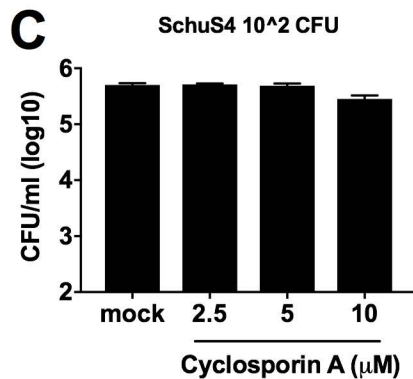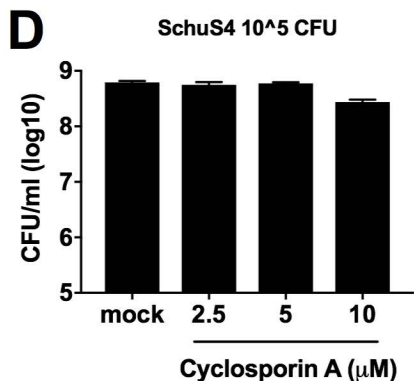

# Figure S10

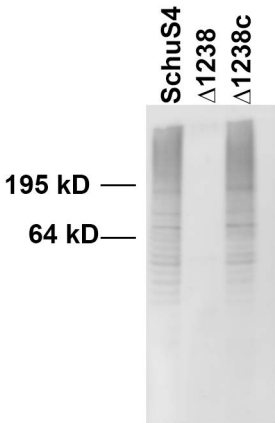

Supplement: IAI.00044-18_zii999092473s2.pdf [file IAI.00044-18_zii999092473s2.pdf]
